# Supplementary material for: Antibiofilm and anticancer activities of unripe and ripe Azadirachta indica (neem) seed extracts
Source: Springer Nature journal article supplement (doi:10.1186/s12906-022-03513-4), 2022-02-14
Supplement: MOESM1 [file 20131090]

996 Antibiofilm and Anticancer Activities of Unripe and Ripe *Azadirachta indica*  
 997 (neem) Seed Extracts

998

999 **Submission ID** -bba31bf8-4a90-4c1a-81fb-35a8e398c33e

1000

1001 **Supplementary Section:**

1002 **Table S1.** OD values at 570 nm wavelength for the determination of MBIC of unripe and ripe  
 1003 neem seed extracts against *S. aureus* and *V. cholerae*. OD<sub>control</sub> for *S.aureus* was 1.241 and,  
 1004 that for *V.cholerae* was 1.132.

| Doses<br>(µg/mL) | OD <sub>570</sub>        |                   |                        |                   |
|------------------|--------------------------|-------------------|------------------------|-------------------|
|                  | Unripe neem seed extract |                   | Ripe neem seed extract |                   |
|                  | <i>S. aureus</i>         | <i>V. cholera</i> | <i>S. aureus</i>       | <i>V. cholere</i> |
| 50               | 0.795                    | 0.803             | 0.645                  | 0.656             |
| 75               | 0.732                    | 0.758             | 0.595                  | 0.598             |
| 100              | 0.583                    | 0.701             | 0.521                  | 0.532             |
| 200              | 0.482                    | 0.589             | 0.459                  | 0.407             |
| 300              | 0.397                    | 0.521             | 0.323                  | 0.271             |
| 400              | 0.285                    | 0.441             | 0.173                  | 0.215             |
| 500              | 0.198                    | 0.362             | 0.087                  | 0.136             |

1005

1006 **Table S2.** OD values at 570 nm wavelength for the determination of MBEC of unripe and  
 1007 ripe neem seed extracts against *S. aureus* and *V. cholerae*. OD<sub>control</sub> for *S.aureus* was 1.214  
 1008 and, that for *V.cholerae* was 1.125.

| Doses<br>(µg/mL) | OD <sub>570</sub>        |                   |                        |                   |
|------------------|--------------------------|-------------------|------------------------|-------------------|
|                  | Unripe neem seed extract |                   | Ripe neem seed extract |                   |
|                  | <i>S. aureus</i>         | <i>V. cholera</i> | <i>S. aureus</i>       | <i>V. cholere</i> |
| 50               | 0.966                    | 0.912             | 0.869                  | 0.753             |
| 150              | 0.882                    | 0.855             | 0.783                  | 0.687             |
| 300              | 0.844                    | 0.753             | 0.598                  | 0.641             |
| 500              | 0.587                    | 0.697             | 0.403                  | 0.472             |

|      |       |       |       |       |
|------|-------|-------|-------|-------|
| 700  | 0.379 | 0.517 | 0.269 | 0.271 |
| 1000 | 0.318 | 0.203 | 0.085 | 0.101 |

1009

1010

1011 **Table S3.** Fluorescence intensities of Ui, Ri, Uii, Rii, Uiii and Riii in respect to their control  
 1012 system from Fig. 6, were measured as Relative Fluorescent Unit (RFU) using imageJ  
 1013 software, and fold changes from their respective control system have been tabulated.

|      | <b>Bacteria</b>    | <b>Fluorecence intensity<br/>change from their<br/>corresponding control<br/>(fold change)</b> |
|------|--------------------|------------------------------------------------------------------------------------------------|
| Ci   | <i>S. aureus</i>   |                                                                                                |
|      | <i>V. cholerae</i> |                                                                                                |
| Ui   | <i>S. aureus</i>   | 1.08                                                                                           |
|      | <i>V. cholerae</i> | 1.03                                                                                           |
| Ri   | <i>S. aureus</i>   | 1.16                                                                                           |
|      | <i>V. cholerae</i> | 1.07                                                                                           |
| Cii  | <i>S. aureus</i>   |                                                                                                |
|      | <i>V. cholerae</i> |                                                                                                |
| Uii  | <i>S. aureus</i>   | 1.35                                                                                           |
|      | <i>V. cholerae</i> | 1.08                                                                                           |
| Rii  | <i>S. aureus</i>   | 1.47                                                                                           |
|      | <i>V. cholerae</i> | 1.31                                                                                           |
| Ciii | <i>S. aureus</i>   |                                                                                                |
|      | <i>V. cholerae</i> |                                                                                                |
| Uiii | <i>S. aureus</i>   | 2.06                                                                                           |
|      | <i>V. cholerae</i> | 1.59                                                                                           |
| Riii | <i>S. aureus</i>   | 3.14                                                                                           |
|      | <i>V. cholerae</i> | 2.56                                                                                           |

1014

1015

1016

1017

1018

1019

1020

1021

1022

1023

1024

1025

1026 **Table S4.** Fold change of live/dead bacterial numbers comparing with their respective control  
1027 system from Fig. 7, have been tabulated. ImagJ software was used to measure this fold  
1028 changes.

|                    |    | <b>Live bacterial cell number</b> | <b>Reduction of live bacterial cell number (fold change)</b> |     | <b>Dead bacterial cell number</b> | <b>Increment of dead bacterial cell number (fold change)</b> |
|--------------------|----|-----------------------------------|--------------------------------------------------------------|-----|-----------------------------------|--------------------------------------------------------------|
| <i>S. aureus</i>   | Ci | 953                               |                                                              | Cii | 98                                |                                                              |
|                    | Ui | 582                               | 1.63                                                         | Uii | 468                               | 4.97                                                         |
|                    | Ri | 130                               | 7.33                                                         | Rii | 822                               | 8.38                                                         |
| <i>V. cholerae</i> | Ci | 788                               |                                                              | Cii | 144                               |                                                              |
|                    | Ui | 502                               | 1.56                                                         | Uii | 388                               | 2.69                                                         |
|                    | Ri | 170                               | 4.63                                                         | Rii | 898                               | 6.23                                                         |

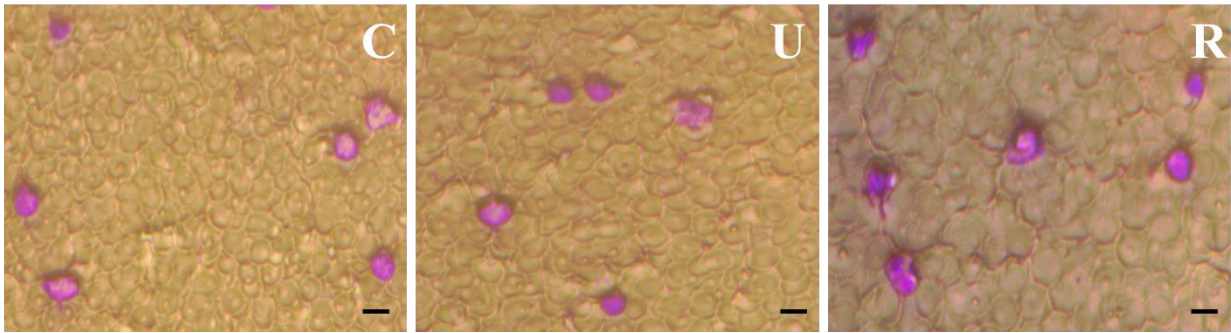

1029

1030 **Fig. S1.** Leishman-stained films of human blood lymphocytes in the cytotoxicity study.  
 1031 Lymphocytes showing no detectable morphological change after the treatment with unripe  
 1032 (U) and ripe (R) neem seed extracts at their highest dose (20 mg) applied. Lymphocytes  
 1033 treated without any seed extracts were used as positive control (C). Scale bar: 10  $\mu$ m.

1034

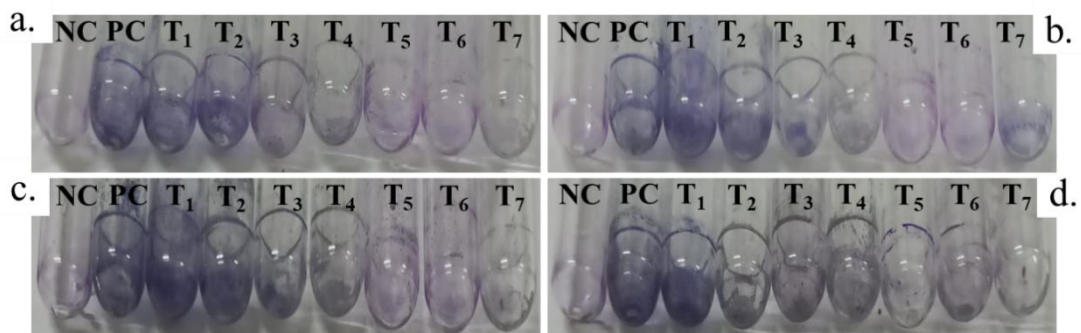

1035

1036 **Fig. S2.** Crystal violet biofilm assay in borosilicate tubes for the estimation of MBIC of  
 1037 unripe (a & b) and ripe (c & d) neem seed extracts against *S. aureus* (a & c) and *V. cholerae*  
 1038 (b & d). NC: Negative control containing only LB broth; PC: Positive control containing LB  
 1039 broth with the respective bacteria; T<sub>1</sub>-T<sub>7</sub>: LB broth containing different concentrations of  
 1040 unripe and ripe neem seed extracts, respectively for each bacteria used in this study.

1041

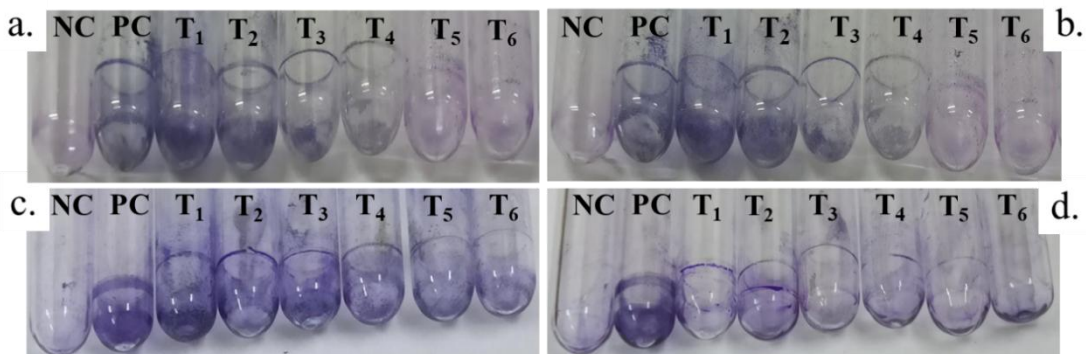

1042

1043 **Fig. S3.** Crystal violet biofilm assay in borosilicate tubes for the estimation of MBEC of  
 1044 unripe (a & b) and ripe (c & d) neem seed extracts against *S. aureus* (a & c) and *V. cholerae*  
 1045 (b & d). NC: Negative control containing only LB broth; PC: Positive control containing LB

1046 broth with the respective bacteria; T<sub>1</sub>-T<sub>7</sub>: Bacterial preformed biofilm treated with different  
1047 concentrations of unripe and ripe neem seed extracts, respectively for each bacteria used in  
1048 this study for biofilm eradication.

1049

1050

1051

1052

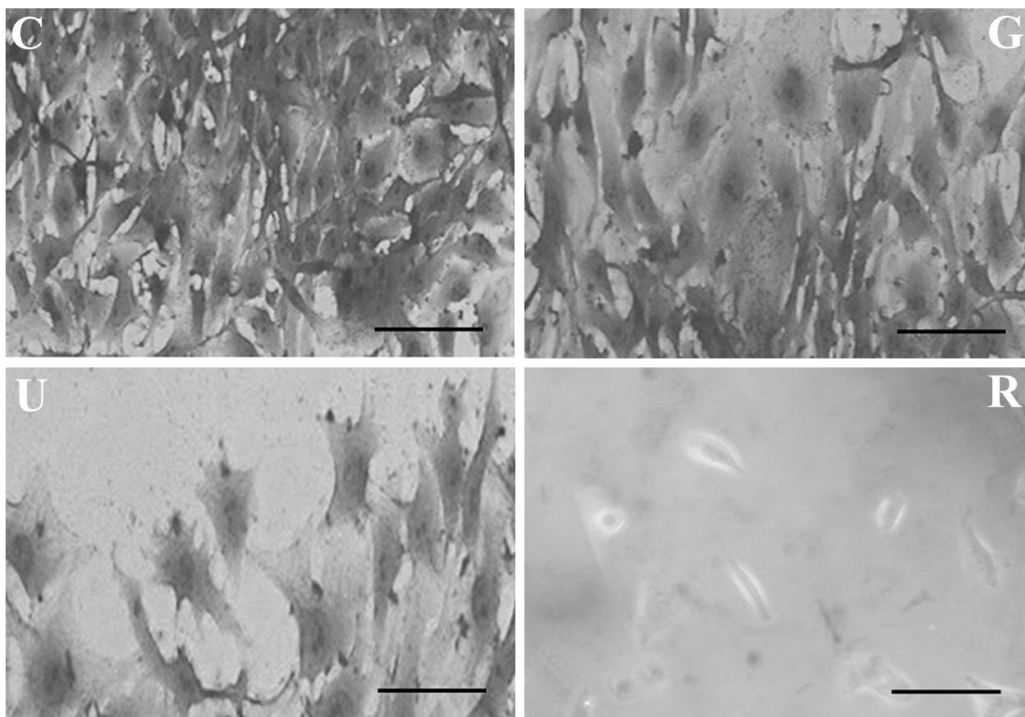

1053

1054 **Fig. S4.** Phase-contrast microscopic studies of MDA-MB-231 breast cancer cells upon  
1055 treatment with neem seed extracts. Morphological changes of MDA-MB-231 breast cancer  
1056 cells were recorded as treated with control drug gemcitabine (G), unripe (U) and ripe (R)  
1057 neem seed extracts for 24 h at their IC<sub>50</sub> doses. Cancer cells without addition of drug or seed  
1058 extracts were considered as positive control (C). Cells were cultured upto 70-80%  
1059 confluence before addition of the drug and/or neem seed extracts. Scale bar: 50  $\mu$ m.

1060
